# Supplementary material
Source: PubMed Central journal article supplement (PMC3837990)
Supplement: IAI.00549-13_zii999090394so2.pdf [file IAI.00549-13_zii999090394so2.pdf]

TABLE S1 Protective capabilities of extracellular *E. rhusiopathiae* proteins  
in mice

| Immunization <sup>a</sup> | Mean time to death<br>(Days; mean $\pm$ S.E.M) |
|---------------------------|------------------------------------------------|
| GroEL                     | 3.25 $\pm$ 0.16                                |
| FBA                       | 2.63 $\pm$ 0.18                                |
| TPI                       | 2.50 $\pm$ 0.19                                |
| PGP                       | 2.75 $\pm$ 0.25                                |
| GAPDH                     | 2.50 $\pm$ 0.19                                |
| IMPDH                     | 2.75 $\pm$ 0.16                                |
| LysA                      | 2.63 $\pm$ 0.18                                |
| CbpA                      | 2.70 $\pm$ 0.15                                |
| CbpB                      | 6.25 $\pm$ 1.13 <sup>b</sup>                   |
| Truncated CbpC            | 2.50 $\pm$ 0.19                                |
| PBS                       | 2.38 $\pm$ 0.18                                |

<sup>a</sup> Ten groups of eight 6- to 8-week-old female BALB/c mice were immunized with recombinant protein (3.6  $\mu$ g) with the Polygen adjuvant (MVP Laboratories, Inc., Omaha, NE, USA) and were given a booster injection 2 weeks later. As a control, ten mice were treated with PBS containing the adjuvant. One week after the booster, the mice were bled to check their antibody response. Three days after blood collection, the mice were s.c. challenged with 0.1 ml of a bacterial suspension containing 10<sup>3</sup> CFU (approximately 100 times the LD<sub>50</sub>) of the Fujisawa strain and observed for death.

<sup>b</sup>  $P < 0.01$  using Student's unpaired *t*-test.
