# Supplementary material
Source: PubMed Central journal article supplement (PMC3837990)
Supplement: IAI.00549-13_zii999090394so3.pdf [file IAI.00549-13_zii999090394so3.pdf]

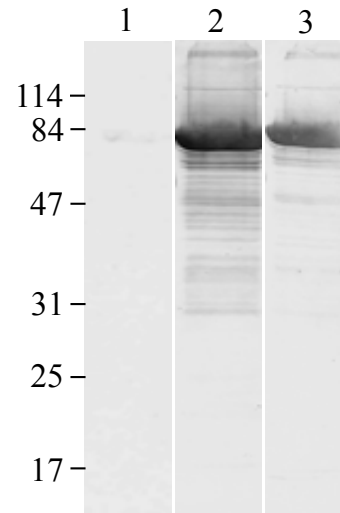

FIG S2. Detection of anti-CbpB IgG antibodies in convalescent-phase sera from naturally *E. rhusiopathiae*-infected pigs. Lanes: 1, control serum from a non-infected pig; 2, convalescent pig serum with an IgG growth-agglutination (GA) titer of x256; 3, convalescent pig serum with an IgG GA titer of x64. The sera were diluted 1:1,000 in PBS, and the bound antibodies were detected with horseradish peroxidase-conjugated rabbit anti-pig IgG (Zymed Laboratories). The positions of the protein molecular mass standards (kDa) are shown to the left.
